# Supplementary material for: Role of interfaces in controlling charge accumulation and injection in the photodetection performance of photomultiplication-type organic photodetectors
Source: Royal Society of Chemistry journal article supplement (doi:10.1039/d0tc01590c), 2020-01-01
Supplement: d0tc01590c1.pdf [file d0tc01590c1.pdf]

## Electronic Supplementary Information

### **Role of interfaces to control charge accumulation and injection in photodetection performance of photomultiplication-type organic photodetectors**

Dechao Guo,<sup>a</sup> Dezhi Yang,<sup>\*a</sup> Jingcheng Zhao,<sup>a</sup> Agafonov Vadim<sup>b</sup> and Dongge Ma<sup>\*a</sup>

<sup>a</sup> Center for Aggregation-Induced Emission, Institute of Polymer Optoelectronic Materials and Devices, Guangdong Provincial Key Laboratory of Luminescence from Molecular Aggregates, State Key Laboratory of Luminescent Materials and Devices, South China University of Technology, Guangzhou 510640, People's Republic of China. E-mail: [msdgma@scut.edu.cn](mailto:msdgma@scut.edu.cn); [msdzyang@scut.edu.cn](mailto:msdzyang@scut.edu.cn)

<sup>b</sup> Moscow Institute of Physics and Technology, Dolgoprudny, Moscow Region, 141700, Russia

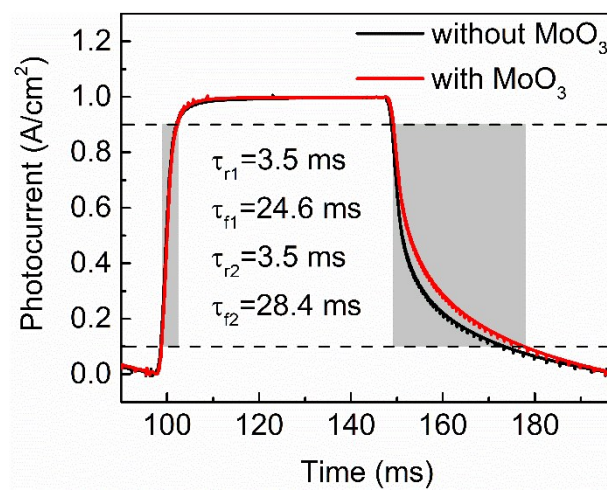

**Figure S1.** Transient photocurrent response ( $J$ - $t$  curve) of the resulting PM-OPDs with and without  $\text{MoO}_3$  at a pulse frequency of 10 Hz and -7 V bias.
